# Supplementary material
Source: PubMed Central journal article supplement (PMC7199283)
Supplement: NIHMS1581389-supplement-2.pdf [file NIHMS1581389-supplement-2.pdf]

**Table S1.** Screening data<sup>1</sup>

| ID   | Formal Name | EC <sub>50</sub> (μM) | CC <sub>50</sub> (μM) | SI (CC <sub>50</sub> /EC <sub>50</sub> ) | HBV RNaseH IC <sub>50</sub> (μM) | HuRH1 IC <sub>50</sub> (μM) | SI <sub>Apparent</sub> (huRH1 IC <sub>50</sub> /EC <sub>50</sub> ) | <i>C. neoformans</i> MIC <sub>80</sub> (μM) | <i>E. coli</i> MIC <sub>80</sub> (μM) | <i>S. aureus</i> MIC <sub>80</sub> (μM) |
|------|-------------|-----------------------|-----------------------|------------------------------------------|----------------------------------|-----------------------------|--------------------------------------------------------------------|---------------------------------------------|---------------------------------------|-----------------------------------------|
| 384  | AB-2-60     | 0.66 ± 0.7            | 17.6 ± 8.9            | 26.8                                     | 48.0 ± 31.8                      | 111 ± 48.8                  | 169                                                                | 3.5                                         | -                                     | -                                       |
| 388  | RA-1-30     | 1.22 ± 1.3            | 19.8 ± 3.0            | 16.2                                     | 77.6 ± 66.2                      | 166 ± 104                   | 136                                                                | 9                                           | 66.7                                  | 66.7                                    |
| 389  | AB-2-66     | 0.43 ± 0.2            | 21.2 ± 9.5            | 49.3                                     | 200 ± 190                        | 78.4 ± 47.2                 | 182                                                                | 5.3                                         | 44.4                                  | 44.4                                    |
| 390  | AB-2-70     | 0.31 ± 0.1            | 24.9 ± 11.6           | 79.6                                     | 23.3 ± 9.1                       | 106 ± 64.6                  | 338                                                                | 22                                          | -                                     | -                                       |
| 391  | AB-2-72     | 0.46 ± 0.2            | 37.5 ± 4.8            | 80.6                                     | 47.6 ± 0                         | 56.1 ± 25.4                 | 121                                                                | 40                                          | -                                     | -                                       |
| 404  | MD-5-75A    | 0.33 ± 0.2            | 4.5 ± 1.4             | 13.7                                     | 27.8 ± 11.6                      | 14.8 ± 10.1                 | 45                                                                 | 9                                           | >100                                  | 67                                      |
| 539  | AB-2-91     | 3.17 ± 1.9            | 3.6 ± 1.8             | 1.1                                      | 98.3 ± 41.9                      | 50.0 ± 9.0                  | 16                                                                 | 4.5                                         | -                                     | 37.5                                    |
| 707  | JS-117      | 0.54 ± 0              | 19.4 ± 8.4            | 36.2                                     |                                  | 148 ± 22.3                  | 277                                                                | 36                                          | -                                     | -                                       |
| 708  | JS-120      | 6.56 ± 5.2            | 22.6 ± 12.8           | 3.4                                      | 58.7 ± 15.5                      | 267 ± 11.7                  | 41                                                                 | 18                                          | -                                     | -                                       |
| 709  | JS-124      | 4.23 ± 6.5            | 19.5 ± 6.7            | 4.6                                      | 81.0 ± 28.7                      | 84.8 ± 6.7                  | 20                                                                 | 50                                          | -                                     | -                                       |
| 710  | JS-112      | 4.17 ± 4.1            | 4.5 ± 3.0             | 1.1                                      | 65.7 ± 18.1                      | 32.3 ± 3.2                  | 8                                                                  | 2.5                                         | 29.6                                  | 29.6                                    |
| 711  | JS-116      | 0.75 ± 0.3            | 4.6 ± 0.8             | 10.2                                     |                                  | 184 ± 0                     | 247                                                                | 4.5                                         | 66.7                                  | 44.4                                    |
| 712  | JS-108      | 0.77 ± 0.5            | 6.4 ± 0.8             | 8.2                                      | 47.5 ± 7.9                       | 116 ± 67.6                  | 150                                                                | 18                                          | 66.7                                  | -                                       |
| 793  | AJF-1.020   | 1.05 ± 0.4            | 18.3 ± 9.8            | 17.4                                     | 110 ± 10.5                       | 178 ± 46.6                  | 169                                                                | 18                                          | -                                     | -                                       |
| 794  | AJF-1.022   | 7.02 ± 4.7            | 14.7 ± 9.6            | 2.1                                      | 36.7 ± 14.6                      | 48.1 ± 15.4                 | 7                                                                  | 9                                           | -                                     | -                                       |
| 795  | AJF-1.021   | 41.2 ± 39.7           | 12.7 ± 5.5            | 0.3                                      | 31.3 ± 1.4                       | 43.5 ± 14.8                 | 1                                                                  | 9                                           | -                                     | -                                       |
| 796  | AJF-1.027   | 1.1 ± 0.1             | 36.0 ± 24.1           | 32.9                                     | 25.4 ± 26.3                      | 83.3 ± 40.2                 | 76                                                                 | 18                                          | -                                     | -                                       |
| 797  | AJF-1.029   | 0.91 ± 0.3            | 13.9 ± 13.3           | 15.3                                     | 52.3 ± 8.2                       | 44.0 ± 27.1                 | 48                                                                 | 9                                           | -                                     | -                                       |
| 798  | AJF-1.031   | 3.47 ± 0.5            | 3.3 ± 1.8             | 0.9                                      | 58.3 ± 49.1                      | 467 ± 0                     | 135                                                                | 1.2                                         | -                                     | -                                       |
| 799  | AJF-1.033   | 3.25 ± 0.8            | 5.3 ± 3.1             | 1.6                                      | 78.5 ± 60.4                      | 713 ± 496                   | 219                                                                | 2                                           | -                                     | -                                       |
| 800  | JS-127      | 0.52 ± 0.2            | 16.5 ± 11.4           | 31.8                                     | 45.6 ± 2.2                       | 46.3 ± 10.2                 | 89                                                                 | 26                                          | -                                     | -                                       |
| 801  | JS-140      | 4.9 ± 1.7             | 61.1 ± 22.8           | 12.5                                     | 603 ± 354                        | 833 ± 289                   | 170                                                                | 50                                          | -                                     | -                                       |
| 802  | JS-136      | 1.19 ± 1.4            | 27.1 ± 31.2           | 22.7                                     | 85.3 ± 29.9                      | 76.5 ± 46.9                 | 64                                                                 | 50                                          | -                                     | -                                       |
| 803  | JS-155      | 1.3 ± 0               | 23.7 ± 22.9           | 18.2                                     | 158 ± 192                        | 36.3 ± 4.0                  | 28                                                                 | 32                                          | -                                     | -                                       |
| 804  | RA-1-62     | 4.53 ± 0.2            | 30.1 ± 18.0           | 6.6                                      | 285 ± 226                        | 802 ± 397                   | 177                                                                | 6.8                                         | -                                     | -                                       |
| 805  | RA-1-70     | 2.45 ± 0.6            | 19.5 ± 10.8           | 8.0                                      | 78.7 ± 46.0                      | 77.0 ± 30.8                 | 31                                                                 | 9                                           | -                                     | -                                       |
| 806  | RA-1-66     | 1.8 ± 0.1             | 15.9 ± 6.9            | 8.8                                      | 122 ± 53.8                       | 61.4 ± 15.9                 | 34                                                                 | 4.6                                         | -                                     | -                                       |
| 807  | RA-1-72     | 1.7 ± 1.0             | 6.0 ± 6.5             | 3.5                                      | 35.6 ± 38.0                      | 799 ± 403                   | 470                                                                | 4.5                                         | -                                     | -                                       |
| 808  | RA-1-74     | 0.48 ± 0.2            | 14.9 ± 8.6            | 31.2                                     | 24.9 ± 5.5                       | 71.9 ± 12.0                 | 151                                                                | 9                                           | -                                     | -                                       |
| 809  | RA-1-82     | 1.7 ± 0.5             | 5.8 ± 6.5             | 3.4                                      | 147 ± 94.1                       | 19.6 ± 20.0                 | 12                                                                 | 3.3                                         | -                                     | -                                       |
| 810  | RA-1-76     | 0.99 ± 0.5            | 10.9 ± 11.2           | 11.0                                     | 41.6 ± 9.3                       | 41.5 ± 7.2                  | 42                                                                 | 4.5                                         | -                                     | -                                       |
| 834  | AB-2-169    | 5.3 ± 0.1             | 16.4 ± 11.2           | 3.1                                      | 83.5 ± 69.3                      | 37.2 ± 17.2                 | 7                                                                  | 9                                           | -                                     | -                                       |
| 835  | RA-1-84     | 5.07 ± 2.5            | 10.3 ± 5.2            | 2.0                                      | 86.0 ± 42.2                      | 725 ± 427                   | 143                                                                | 4.5                                         | -                                     | -                                       |
| 836  | RA-1-86     | 3.23 ± 0.7            | 5.4 ± 3.5             | 1.7                                      | 78.9 ± 49.1                      | 606 ± 482                   | 188                                                                | 4.5                                         | -                                     | -                                       |
| 837  | RA-1-88     | 6.0 ± 2.0             | 8.7 ± 3.4             | 1.5                                      | 118 ± 88.7                       | 625 ± 451                   | 104                                                                | 4.5                                         | -                                     | -                                       |
| 867  | DS-1-124    | 5.25 ± 1.2            | 5.2 ± 1.3             | 1.0                                      | 567 ± 474                        | 675 ± 563                   | 129                                                                | 4.3                                         | -                                     | -                                       |
| 868  | DS-1-133    | 54.5 ± 4.9            | 100 ± 0               | 1.8                                      | 40.7 ± 25.4                      | 27.7 ± 20.3                 | 1                                                                  | 50                                          | -                                     | -                                       |
| 869  | DS-1-132    | 13.2 ± 0.6            | 14.6 ± 3.4            | 1.1                                      | 769 ± 462                        | 602 ± 273                   | 46                                                                 | 9                                           | -                                     | -                                       |
| 870  | DS-1-134    | 4.2 ± 0.7             | 9.1 ± 2.7             | 2.2                                      | 76.7 ± 94.4                      | 289 ± 296                   | 69                                                                 | 5                                           | -                                     | -                                       |
| 871  | RA-1-96     | 1.15 ± 0.4            | 36.6 ± 3.6            | 32.0                                     | 166 ± 98.8                       | 88.2 ± 43.3                 | 77                                                                 | 50                                          | -                                     | -                                       |
| 872  | RA-1-94     | 0.84 ± 0.4            | 14.4 ± 3.7            | 17.2                                     | 42.5 ± 31.2                      | 93.0 ± 53.3                 | 111                                                                | 20                                          | -                                     | -                                       |
| 873  | RA-1-32     | 1.43 ± 0.7            | 19.5 ± 8.7            | 13.7                                     | 46.5 ± 39.5                      | 74.7 ± 23.1                 | 52                                                                 | 20                                          | -                                     | -                                       |
| 874  | JS-164      | 5.75 ± 1.2            | 17.7 ± 6.7            | 3.1                                      | 597 ± 124                        | 52.6 ± 0                    | 9                                                                  | 14                                          | -                                     | -                                       |
| 875  | JS-165      | 1.47 ± 1.5            | 4.7 ± 1.8             | 3.2                                      | 9.7 ± 4.6                        | 17.2 ± 11.0                 | 12                                                                 | 7                                           | -                                     | -                                       |
| 876  | JS-166      | 0.7 ± 0.4             | 9.2 ± 3.2             | 13.2                                     | 18.5 ± 5.6                       | 39.2 ± 40.6                 | 56                                                                 | 9                                           | -                                     | -                                       |
| 877  | JS-167      | 0.98 ± 0.5            | 16.5 ± 1.4            | 16.8                                     | 50.2 ± 21.7                      | 34.9 ± 7.2                  | 36                                                                 | 14                                          | -                                     | -                                       |
| 917  | JS-1-173    | 1.83 ± 1.3            | 8.9 ± 4.1             | 4.9                                      | 9.7 ± 3.8                        | 30.7 ± 15.8                 | 17                                                                 | 50                                          | -                                     | -                                       |
| 918  | JS-174      | 1.45 ± 0.4            | 43.8 ± 10.7           | 30.1                                     | 82.2 ± 25.1                      | 127 ± 98.1                  | 87                                                                 | 50                                          | -                                     | -                                       |
| 919  | JS-1-170    | 1.08 ± 0.3            | 5.5 ± 1.9             | 5.1                                      | 1000 ± 0                         | 1000 ± 0                    | 929                                                                | 2.5                                         | -                                     | 29.6                                    |
| 920  | RA-1-104    | 1.03 ± 0.3            | 19.3 ± 14.6           | 18.7                                     | 4.1 ± 2.2                        | 40.2 ± 39.7                 | 39                                                                 | 50                                          | -                                     | -                                       |
| 1016 | AL-20       | 0.9 ± 0               | 24.6 ± 40.0           | 27.4                                     | 74.1 ± 73.9                      | 5.1 ± 2.7                   | 6                                                                  | 18                                          | -                                     | -                                       |
| 1017 | AL-23       | 5.6 ± 0               | 3.9 ± 1.4             | 0.7                                      | 122 ± 1.2                        | 29.9 ± 10.7                 | 5                                                                  | 6                                           | -                                     | -                                       |
| 1018 | AL-17       | 2.3 ± 0.3             | 41.2 ± 33.4           | 17.9                                     | 71.0 ± 21.6                      | 129 ± 123                   | 56                                                                 | 50                                          | -                                     | -                                       |
| 1019 | AL-22       | 5.0 ± 0.4             | 10.7 ± 6.0            | 2.1                                      | 129 ± 43.3                       | 383 ± 471                   | 77                                                                 | 4.5                                         | -                                     | -                                       |
| 1020 | JS-I-191    | 2.65 ± 0.4            | 7.8 ± 3.7             | 2.9                                      | 8.9 ± 0.4                        | 12.9 ± 7.3                  | 5                                                                  | 8                                           | -                                     | -                                       |
| 1021 | JS-II-9     | 3.05 ± 0.6            | 10.4 ± 7.3            | 3.4                                      | 17.9 ± 8.8                       | 44.0 ± 46.2                 | 14                                                                 | 4.5                                         | -                                     | -                                       |
| 1039 | AB-3-45     | 3.35 ± 2.1            | 8.7 ± 2.8             | 2.6                                      | 33.9 ± 2.8                       | 219 ± 87.6                  | 65                                                                 | 12                                          | -                                     | -                                       |

<sup>1</sup>Blank, no data; -, no detectable activity
