# Supplementary material
Source: PubMed Central journal article supplement (PMC7199283)
Supplement: NIHMS1581389-supplement-3.pdf [file NIHMS1581389-supplement-3.pdf]

**Table S2. *In silico* docking scores for compounds to the HBV RNaseH homology model**

| Compound number | Name      | No constraints <sup>a</sup> |          |           | Constrained to predicted binding pose <sup>a</sup> |           |
|-----------------|-----------|-----------------------------|----------|-----------|----------------------------------------------------|-----------|
|                 |           | (pH 4-6)                    | (pH 6-8) | (pH 8-10) | (pH 6-8)                                           | (pH 8-10) |
| 384             | AB-2-60   | -2.871                      | -2.22    | -6.031    | <sup>b</sup>                                       | -6.06     |
| 388             | RA-1-30   | -3.608                      | -5.293   | -6.148    | -3.56                                              | -5.544    |
| 389             | AB-2-66   | -3.787                      | -4.155   | -6.145    | -4.152                                             | -6.169    |
| 390             | AB-2-70   | -3.331                      | -6.009   | -8.024    | -5.178                                             | -6.123    |
| 391             | AB-2-72   | -3.09                       | -3.863   | -7.224    | -5.68                                              | -7.224    |
| 404             | MD-5-75A  | -2.477                      | -5.619   | -6.431    | -3.444                                             | -5.505    |
| 539             | AB-2-91   | -3.148                      | -4.849   | -5.673    | -2.95                                              | -5.539    |
| 707             | JS-117    | -3.704                      | -4.194   | -5.958    | -4.193                                             | -5.743    |
| 708             | AB-3-45   | -3.286                      | -4.274   | -6.814    | -3.349                                             | -6.625    |
| 709             | JS-124    | -3.761                      | -4.814   | -7.397    | -4.358                                             | -7.083    |
| 710             | JS-112    | -2.592                      | -4.069   | -6.565    | -2.363                                             | -6.542    |
| 711             | JS-116    | -3.604                      | -4.193   | -5.532    | -3.501                                             | -6.202    |
| 712             | JS-108    | -3.546                      | -5.386   | -6.971    | -5.147                                             | -6.468    |
| 793             | AJF-1.020 | -3.578                      | -4.774   | -5.61     | -4.927                                             | -5.599    |
| 794             | AJF-1.022 | -3.169                      | -4.46    | -5.301    | -5.303                                             | -6.031    |
| 795             | AJF-1.021 | -3.457                      | -7.049   | -7.685    | -4.321                                             | -6.486    |
| 796             | AJF-1.027 | -2.276                      | -4.646   | -6.159    | -3.707                                             | -6.084    |
| 797             | AJF-1.029 | -3.296                      | -5.383   | -6.791    | -6.036                                             | -6.677    |
| 798             | AJF-1.031 | -3.198                      | -3.876   | -6.732    | -1.963                                             | -5.675    |
| 799             | AJF-1.033 | -3.116                      | -3.766   | -6.076    | -0.75                                              | -6.374    |
| 800             | JS-127    | -1.463                      | -4.526   | -5.859    | -4.121                                             | -6.209    |
| 801             | JS-140    | -3.807                      | -3.678   | -6.543    | -3.676                                             | -6.127    |
| 802             | JS-136    | -1.79                       | -4.071   | -7.088    | -4.381                                             | -6.385    |
| 803             | JS-155    | -1.866                      | -4.86    | -6.281    | -3.517                                             | -6.437    |
| 804             | RA-1-62   | -3.314                      | -4.754   | -5.605    | -3.412                                             | -4.603    |
| 805             | RA-1-70   | -2.77                       | -2.153   | -5.67     |                                                    | -5.682    |
| 806             | RA-1-66   | -3.653                      | -4.033   | -5.82     | -3.196                                             | -5.797    |
| 807             | RA-1-72   | -3.033                      | -5.186   | -6.009    | -1.136                                             | -5.233    |
| 808             | RA-1-74   | -3.112                      | -3.257   | -5.897    | -3.299                                             | -5.942    |
| 809             | RA-1-82   | -3.232                      | -4.917   | -6.348    | -3.359                                             | -6.491    |
| 810             | RA-1-76   | -2.661                      | -3.31    | -5.542    | -4.625                                             | -5.512    |
| 834             | AB-2-169  | -2.373                      | -4.369   | -6.609    |                                                    | -6.66     |

|      |          |        |        |        |        |        |
|------|----------|--------|--------|--------|--------|--------|
| 835  | RA-1-84  | -2.602 | -4.617 | -6.038 |        | -4.726 |
| 836  | RA-1-86  | -3.471 | -3.554 | -6.237 | -4.261 | -5.475 |
| 837  | RA-1-88  | -3.691 | -3.615 | -4.865 | -3.14  | -5.271 |
| 867  | DS-1-124 | -2.775 | -4.259 | -5.88  | -3.143 | -5.73  |
| 868  | DS-1-133 | -6.594 | -6.251 | -7.106 |        |        |
| 869  | DS-1-132 | -2.774 | -3.566 | -5.12  | 0.595  | -4.326 |
| 870  | DS-1-134 | -3.057 | -4.449 | -5.27  | -3.107 | -5.462 |
| 871  | RA-1-96  | -2.873 | -4.755 | -6.566 | -5.031 | -5.941 |
| 872  | RA-1-94  | -2.711 | -4.178 | -6.348 | -3.955 | -5.934 |
| 873  | RA-1-32  | -2.508 | -4.669 | -5.439 | -4.277 | -5.467 |
| 874  | JS-164   | -2.308 | -2.785 | -5.546 | -0.157 | -5.236 |
| 875  | JS-165   | -2.429 | -4.058 | -6.393 | -3.467 | -5.892 |
| 876  | JS-166   | -2.472 | -4.68  | -6.913 | -3.747 | -5.781 |
| 877  | RA-1-167 | -2.377 | -4.294 | -6.316 | -3.37  | -5.468 |
| 917  | JS-1-173 | -2.349 | -3.364 | -6.24  | -3.413 | -6.239 |
| 918  | JS-174   | -1.404 | -3.597 | -6.259 | -3.741 | -6.108 |
| 919  | JS-170   | -1.989 | -2.39  | -2.582 | -1.422 | -2.364 |
| 920  | RA-1-104 | -2.084 | -3.891 | -6.074 | -3.032 | -2.546 |
| 1016 | AL-20    | -2.082 | -2.412 | -2.699 | -1.457 | -1.855 |
| 1017 | AL-23    | -1.59  | -3.794 | -1.677 | -2.867 | -1.689 |
| 1018 | AL-17    | -4.588 | -5.75  | -6.605 |        | -6.809 |
| 1019 | AL-22    | -3.281 | -4.904 | -6.052 | -3.069 | -5.599 |
| 1020 | JS-1-191 |        |        |        |        |        |
| 1021 | JS-2-9   | -2.074 | -5.258 | -6.355 | -3.448 | -5.342 |
| 1039 | AB-3-45  | -3.426 | -2.814 | -5.447 |        | -5.793 |

<sup>a</sup> Values are in kcal/mol

<sup>b</sup> Missing values indicate positive docking scores

## Docking strategy

The active site of the HBV RNaseH model contains two  $Mn^{++}$  ions placed in positions analogous to where they are found in HIV RNaseH crystal structures.  $\alpha$ -Hydroxytropolones are known to chelate metal ions in other enzyme actives using the oxygen triad, and this effect is expected to play a key role in the compounds' inhibition of the enzyme. For this reason, binding poses that involved cation coordination were explicitly explored.

"Constrained" poses were obtained with docking parameters that designated spherical coordinate spaces for the metal centers to be used for octahedral coordination rather than simply being cations. This returned primarily poses that placed the appropriate atom types in these spaces. This approach did not return poses that stray significantly from the expected chelation-mediated binding pattern.

"Unconstrained" poses were those with the best docking score without requiring that the compound contact the  $Mn^{++}$  ions. This was done to identify binding poses that are energetically favorable but may not fit the expected double cation chelation pose.
